# Supplementary material
Source: publisher figshare collection journal article supplement (https://plos.figshare.com/articles/dataset/_/1447325)
Supplement: Supplementary file 1 [file 1]

Archive with 5 entries (5 files):
- S1_Table.pdf
- S2_Table.pdf
- S3_Table.pdf
- S4_Table.pdf
- S5_Table.pdf
