# Supplementary material
Source: publisher figshare collection journal article supplement (https://plos.figshare.com/articles/dataset/_/1447325)
Supplement: Supplementary file 1 [file 1 › S1_Table.pdf]

**S1 Table. The Counterfactual Inference Test – CIT.** Correct or normative responses to these questions are in bold and are 1)a, 2)b, 3)b, 4)a.

---

1. Janet is attacked by a mugger only 10 feet from her house. Susan is attacked by a mugger a mile from her house. Who is more upset by the mugging?

- a) **Janet**
  - b) Susan
  - c) Same
  - d) Can't tell
- 

2. Ann gets sick after eating at a restaurant she often visits. Sarah gets sick after eating at a restaurant she has never visited before. Who regrets their choice of restaurant more?

- a) Ann
  - b) **Sarah**
  - c) Same
  - d) Can't tell
- 

3. Jack misses his train by 5 minutes. Ed misses his train more than an hour. Who spends more time thinking about the missed train?

- a) Ed
  - b) **Jack**
  - c) Same
  - d) Can't tell
- 

4. John gets into a car accident while driving on his usual way home. Bob gets into a car accident while trying a new way home. Who thinks more about how his accident could have been avoided?

- a) **Bob**
  - b) John
  - c) Same
  - d) Can't tell
-
