# Supplementary material
Source: publisher figshare collection journal article supplement (https://plos.figshare.com/articles/dataset/_/1447325)
Supplement: Supplementary file 1 [file 1 › S3_Table.pdf]

**S3 Table. Correlations between *CIT* and *Level of confidence* and cognitive tests in HD patients.**

|                             | <i>CIT</i>                |         | <i>Level of confidence</i> |         |
|-----------------------------|---------------------------|---------|----------------------------|---------|
|                             | Correlation Coefficient r | p value | Correlation Coefficient r  | p value |
| <b>MMSE</b>                 | .045                      | 0.831   | -.004                      | 0.982   |
| <b>Rey's Imm</b>            | -.074                     | 0.728   | -.250                      | 0.236   |
| <b>Rey's Del</b>            | -.021                     | 0.921   | -.131                      | 0.536   |
| <b>Verbal Phon Flu Test</b> | .237                      | 0.262   | -.138                      | 0.515   |
| <b>Verbal Sem Flu Test</b>  | .181                      | 0.393   | .055                       | 0.796   |
| <b>TMT – Part A</b>         | .127                      | 0.550   | .034                       | 0.8723  |
| <b>TMT – Part B</b>         | .042                      | 0.848   | .250                       | 0.257   |
| <b>TMT – Part B-A</b>       | -.043                     | 0.844   | .247                       | 0.264   |
| <b>FAB</b>                  | -.050                     | 0.812   | -.213                      | 0.313   |
| <b>Symbol Digit</b>         | -.033                     | 0.875   | .071                       | 0.737   |
| <b>Stroop WR</b>            | -.010                     | 0.963   | .030                       | 0.885   |
| <b>Stroop CN</b>            | .075                      | 0.725   | -.058                      | 0.783   |
| <b>Stroop Interf</b>        | -.060                     | 0.777   | .098                       | 0.644   |

MMSE: Mini-Mental State Examination; Rey's Imm: Rey's 15 Words Test Immediate Recall; Rey's Del: Rey's 15 Words Test Delayed Recall; Verbal Phon Flu Test: Verbal Phonemic Fluency Test; Verbal Sem Flu Test: Verbal Semantic Fluency Test; TMT: Trail Making Test; FAB: Frontal Assessment Battery; Symbol Digit: Symbol Digit Modalities Test; Stroop WR: Stroop Colour-Word Test – Word Reading; Stroop CN: Stroop Colour-Word Test – Colour Naming; Stroop Interf: Stroop Colour-Word Test – Interference.
