# Supplementary material
Source: publisher figshare collection journal article supplement (https://plos.figshare.com/articles/dataset/_/1447325)
Supplement: Supplementary file 1 [file 1 › S4_Table.pdf]

**S4 Table. Correlations between CFT tests and clinical data in HD patients.**

|                                                 | <i>Spontaneous Counterfactual<br/>Generation Test</i> |                | <i>CIT</i>                           |                | <i>Level of confidence</i>           |                |
|-------------------------------------------------|-------------------------------------------------------|----------------|--------------------------------------|----------------|--------------------------------------|----------------|
|                                                 | <b>Correlation<br/>Coefficient r</b>                  | <b>ρ value</b> | <b>Correlation<br/>Coefficient r</b> | <b>ρ value</b> | <b>Correlation<br/>Coefficient r</b> | <b>ρ value</b> |
| <b>CAG repeats<br/>number</b>                   | .201                                                  | 0.342          | -.009                                | 0.963          | .047                                 | 0.824          |
| <b>Duration of<br/>illness</b>                  | -.124                                                 | 0.558          | -.055                                | 0.796          | .080                                 | 0.706          |
| <b>Total Motor<br/>Score –<br/>UHDRS Part I</b> | -.293                                                 | 0.164          | -.126                                | 0.559          | .132                                 | 0.537          |
| <b>Maximal<br/>Chorea –<br/>UHDRS Part I</b>    | -.225                                                 | 0.301          | .068                                 | 0.757          | .323                                 | 0.133          |
