# Supplementary material
Source: publisher figshare collection journal article supplement (https://plos.figshare.com/articles/dataset/_/1447325)
Supplement: Supplementary file 1 [file 1 › S5_Table.pdf]

**S5 Table. Correlations between CFT tests and psychological measures in HD patients.**

|                                    | <i>Spontaneous Counterfactual<br/>Generation Test</i> |                | <i>CIT</i>                           |                | <i>Level of confidence</i>           |                |
|------------------------------------|-------------------------------------------------------|----------------|--------------------------------------|----------------|--------------------------------------|----------------|
|                                    | <b>Correlation<br/>Coefficient r</b>                  | <b>p value</b> | <b>Correlation<br/>Coefficient r</b> | <b>p value</b> | <b>Correlation<br/>Coefficient r</b> | <b>p value</b> |
| <b>Rosenberg SES</b>               | .079                                                  | 0.712          | .038                                 | 0.856          | -.238                                | 0.260          |
| <b>Rotter I-E Scale</b>            | -.351                                                 | 0.091          | .294                                 | 0.161          | .088                                 | 0.679          |
| <b>BFQ Extrav Tot</b>              | -.094                                                 | 0.658          | -.082                                | 0.700          | .265                                 | 0.207          |
| <b>BFQ Friend Tot</b>              | -.041                                                 | 0.847          | .149                                 | 0.483          | .351                                 | 0.091          |
| <b>BFQ Conscient<br/>Tot</b>       | .262                                                  | 0.213          | .043                                 | 0.837          | .120                                 | 0.572          |
| <b>BFQ Emotional<br/>Stab Tot</b>  | .070                                                  | 0.740          | -.181                                | 0.393          | -.118                                | 0.578          |
| <b>BFQ Openness<br/>to Exp Tot</b> | .322                                                  | 0.123          | -.119                                | 0.575          | .019                                 | 0.927          |
| <b>BFQ Lie</b>                     | -.294                                                 | 0.161          | -.103                                | 0.626          | .125                                 | 0.555          |
| <b>BDI-CA</b>                      | -.323                                                 | 0.121          | -.002                                | 0.987          | .090                                 | 0.670          |
| <b>BDI-SP</b>                      | -.116                                                 | 0.586          | -.164                                | 0.441          | .389                                 | 0.059          |
| <b>BDI Tot</b>                     | -.243                                                 | 0.250          | -.040                                | 0.850          | .235                                 | 0.264          |
| <b>STAI-Y1</b>                     | .000                                                  | 0.998          | -.057                                | 0.787          | .011                                 | 0.956          |
| <b>STAI-Y2</b>                     | -.140                                                 | 0.509          | -.001                                | 0.995          | .185                                 | 0.382          |
| <b>SCL-90 SOM</b>                  | .331                                                  | 0.112          | .024                                 | 0.908          | -.182                                | 0.391          |
| <b>SCL-90 OC</b>                   | .093                                                  | 0.661          | -.157                                | 0.458          | .134                                 | 0.528          |
| <b>SCL-90 IS</b>                   | -.003                                                 | 0.989          | .173                                 | 0.414          | .088                                 | 0.679          |
| <b>SCL-90 DEP</b>                  | .032                                                  | 0.879          | .012                                 | 0.953          | .080                                 | 0.706          |
| <b>SCL-90 ANX</b>                  | .110                                                  | 0.603          | -.004                                | 0.982          | .087                                 | 0.679          |
| <b>SCL-90 HOS</b>                  | -.026                                                 | 0.901          | .036                                 | 0.866          | -.120                                | 0.572          |
| <b>SCL-90 PHOB</b>                 | -.328                                                 | 0.116          | -.174                                | 0.412          | -.074                                | 0.728          |
| <b>SCL-90 PAR</b>                  | .087                                                  | 0.682          | -.122                                | 0.566          | .173                                 | 0.414          |
| <b>SCL-90 PSI</b>                  | -.134                                                 | 0.528          | -.115                                | 0.589          | -.032                                | 0.879          |
| <b>SF-36 PF</b>                    | .003                                                  | 0.989          | .107                                 | 0.615          | -.005                                | 0.979          |
| <b>SF-36 RP</b>                    | .321                                                  | 0.123          | .151                                 | 0.476          | -.146                                | 0.491          |
| <b>SF-36 BP</b>                    | .033                                                  | 0.872          | -.041                                | 0.847          | .294                                 | 0.161          |
| <b>SF-36 GH</b>                    | .355                                                  | 0.088          | .098                                 | 0.644          | -.261                                | 0.213          |
| <b>SF-36 VT</b>                    | .133                                                  | 0.531          | .032                                 | 0.879          | -.176                                | 0.405          |
| <b>SF-36 SF</b>                    | .074                                                  | 0.728          | .012                                 | 0.953          | .032                                 | 0.879          |
| <b>SF-36 RE</b>                    | .031                                                  | 0.885          | .197                                 | 0.351          | -.245                                | 0.245          |
| <b>SF-36 MH</b>                    | .163                                                  | 0.443          | .029                                 | 0.888          | -.126                                | 0.553          |

|                 |       |       |      |       |       |       |
|-----------------|-------|-------|------|-------|-------|-------|
| <b>SF-36 HT</b> | -.328 | 0.115 | .072 | 0.734 | .146  | 0.491 |
| <b>DEX</b>      | -.210 | 0.319 | .277 | 0.186 | -.045 | 0.834 |

Rosenberg SES: Rosenberg Self-Esteem Scale; Rotter I-E Scale: Rotter Internal-External Locus of Control Scale; BFQ Extrav Tot: Big Five Questionnaire Extraversion Total score; BFQ Friend Tot: Big Five Questionnaire Friendliness Total score; BFQ Conscient Tot: Big Five Questionnaire Conscientiousness Total score; BFQ Emotional Stab Tot: Big Five Questionnaire Emotional Stability Total score; BFQ Openness to Exp Tot: Big Five Questionnaire Openness to Experience Total score; BFQ Lie: Big Five Questionnaire Lie score; BDI-CA: Beck Depression Inventory Cognitive-Affective component; BDI-SP: Beck Depression Inventory Somatic-Performance component; BDI Tot: Beck Depression Inventory Total Score; STAI-Y1/Y2: State-Trait Anxiety Inventory; SCL-90 SOM: Symptom Check List-90 Somatization; SCL-90 OC: Symptom Check List-90 Obsessive-Compulsive; SCL-90 IS: Symptom Check List-90 Interpersonal Sensitivity; SCL-90 DEP: Symptom Check List-90 Depression; SCL-90 ANX: Symptom Check List-90 Anxiety; SCL-90 HOS: Symptom Check List-90 Hostility; SCL-90 PHOB: Symptom Check List-90 Phobic Anxiety; SCL-90 PAR: Symptom Check List-90 Paranoid Ideation; SCL-90 PSY: Symptom Check List-90 Psychoticism; SF-36 PF: physical functioning; SF-36 RP: role limitations due to physical health; SF-36 BP: body pain; SF-36 GH: general health; SF-36 VT: vitality; SF-36 SF: social functioning; SF-36 RE: role-emotional; SF-36 MH: mental health; SF-36 HT: reported health transition; DEX: Dysexecutive Questionnaire.
